# Supplementary material for: A molecular electron density theory study of the participation of tetrazines in aza-Diels–Alder reactions
Source: Royal Society of Chemistry journal article supplement (doi:10.1039/d0ra01548b), 2020-01-01
Supplement: d0ra01548b1.pdf [file d0ra01548b1.pdf]

## Electronic Supporting Information

### A Molecular Electron Density Theory Study of the Participation of Tetrazines in Aza-Diels-Alder Reactions

Luis R. Domingo,<sup>1\*</sup> Mar Ríos-Gutiérrez,<sup>1,2</sup> and Patricia Pérez<sup>3\*</sup>

<sup>1</sup> Department of Organic Chemistry, University of Valencia, Dr. Moliner 50, 46100 Burjassot, Valencia, Spain.

<sup>2</sup> Department of Chemistry and Chemical Biology, McMaster University, 1280 Main Street West, Hamilton, Ontario L8S 4L8, Canada

<sup>3</sup> Universidad Andres Bello, Facultad de Ciencias Exactas, Departamento de Ciencias Químicas, Computational and Theoretical Chemistry Group, Av. República 498, 8370146 Santiago, Chile.

E-mail: domingo@utopia.uv.es; p.perez@unab.cl

#### Index

- S2** Figure with the geometries of **MCa** and **MCh**.
- S3** Figure with the attractor positions of the ELF valence basins of the relevant IRC structures of the ADA reaction between dinitro tetrazine **14a** and TME **15**.
- S4** Figure with the attractor positions of the ELF valence basins of the **TS1a-h**.
- S5** Table with MPW95/6-311G(d,p) Global CDFT reactivity indices for the studied reagents.
- S6** Tables with the MPW95/6-311G(d,p) electronic energies, enthalpies, entropies and Gibbs free energies for the stationary points involved in the domino reactions of the series tetrazine derivatives **14a-h** with TME **15**.
- S8** Table with the MPW95/6-311G(d,p) electronic energies, enthalpies, entropies and Gibbs free energies for the stationary points involved in the domino reactions of the series tetrazine derivatives **14f-h** with TCE **18**.
- S9** Table with the MPWB1K/6-311G(d,p) unique imaginary frequency of **TS1a-k** and **TS2a-k**.

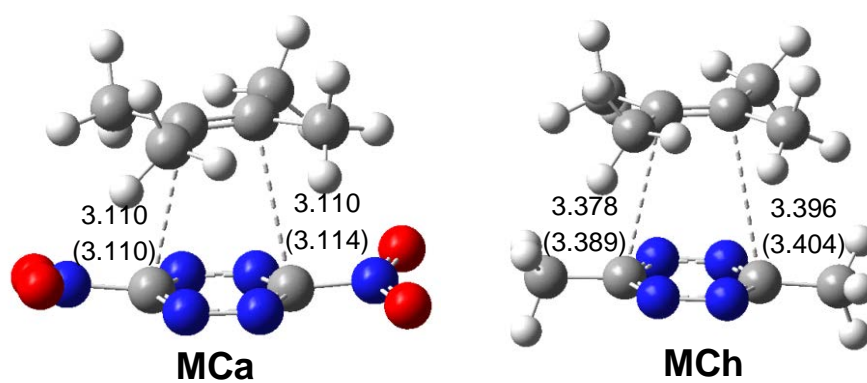

**Figure S1.** MPMWB95/6-311(d,p) geometries of the MCs **MCa** and **MCh**. The distances are given in Angstroms. Values in DCM are given in parentheses.

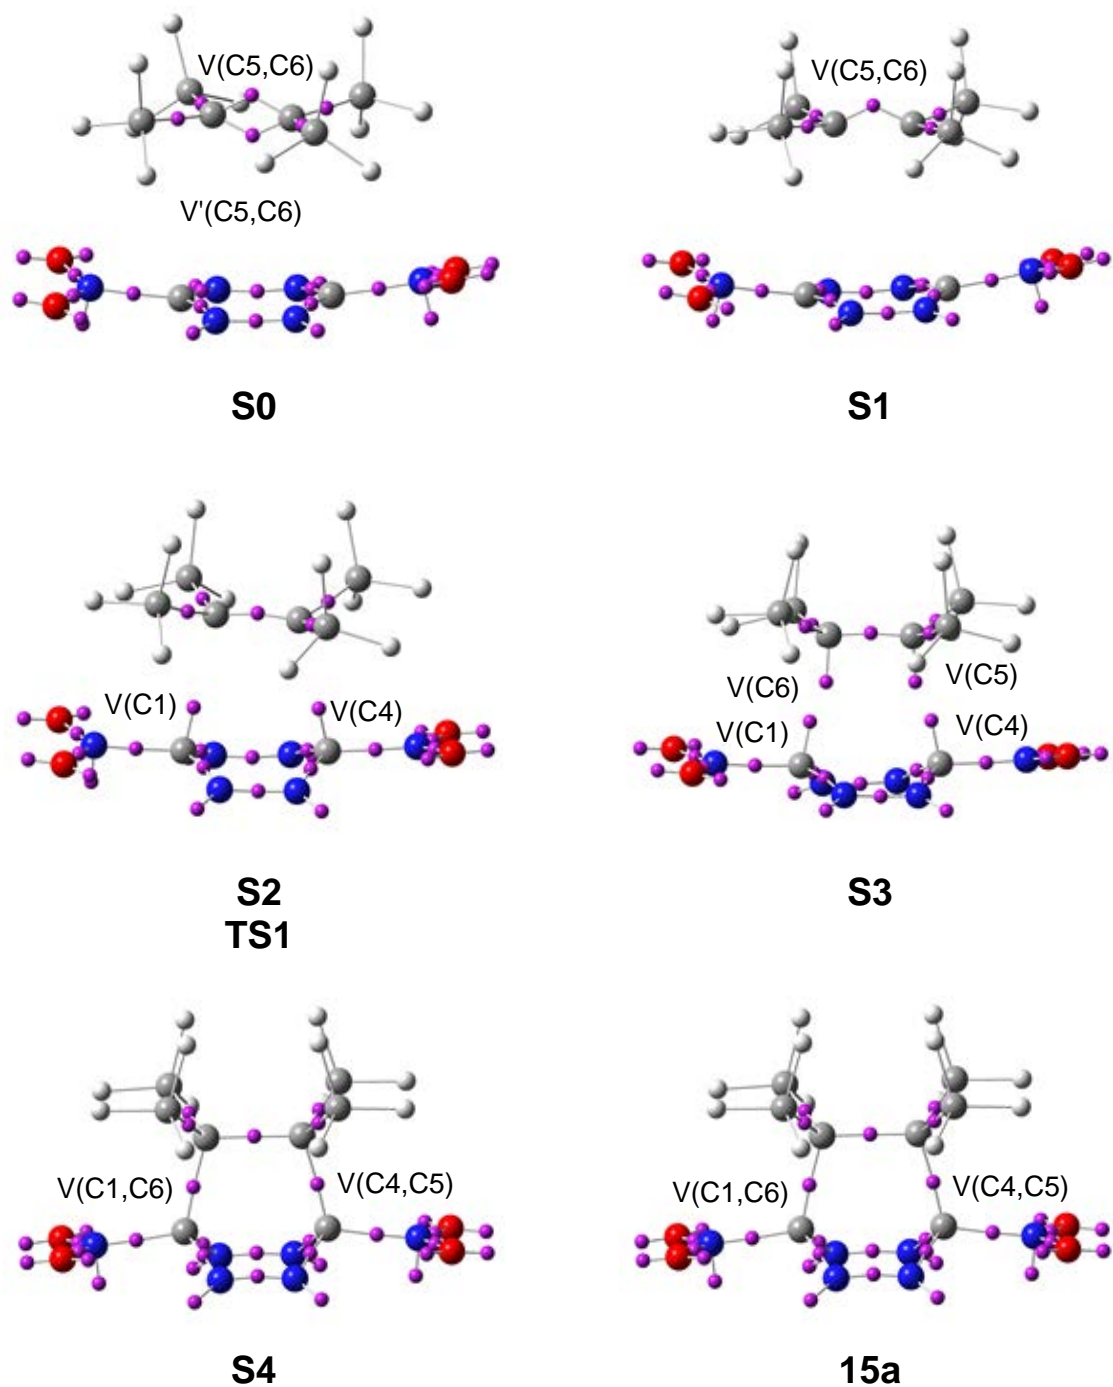

**Figure S2.** Attractor positions of the ELF valence basins of the IRC structures, S0 – S4, defining the five phases characterizing the molecular mechanism of the polar ADA reaction between dinitro tetrazine **14a** and TME **15**, TS1a and **15a** are also included.

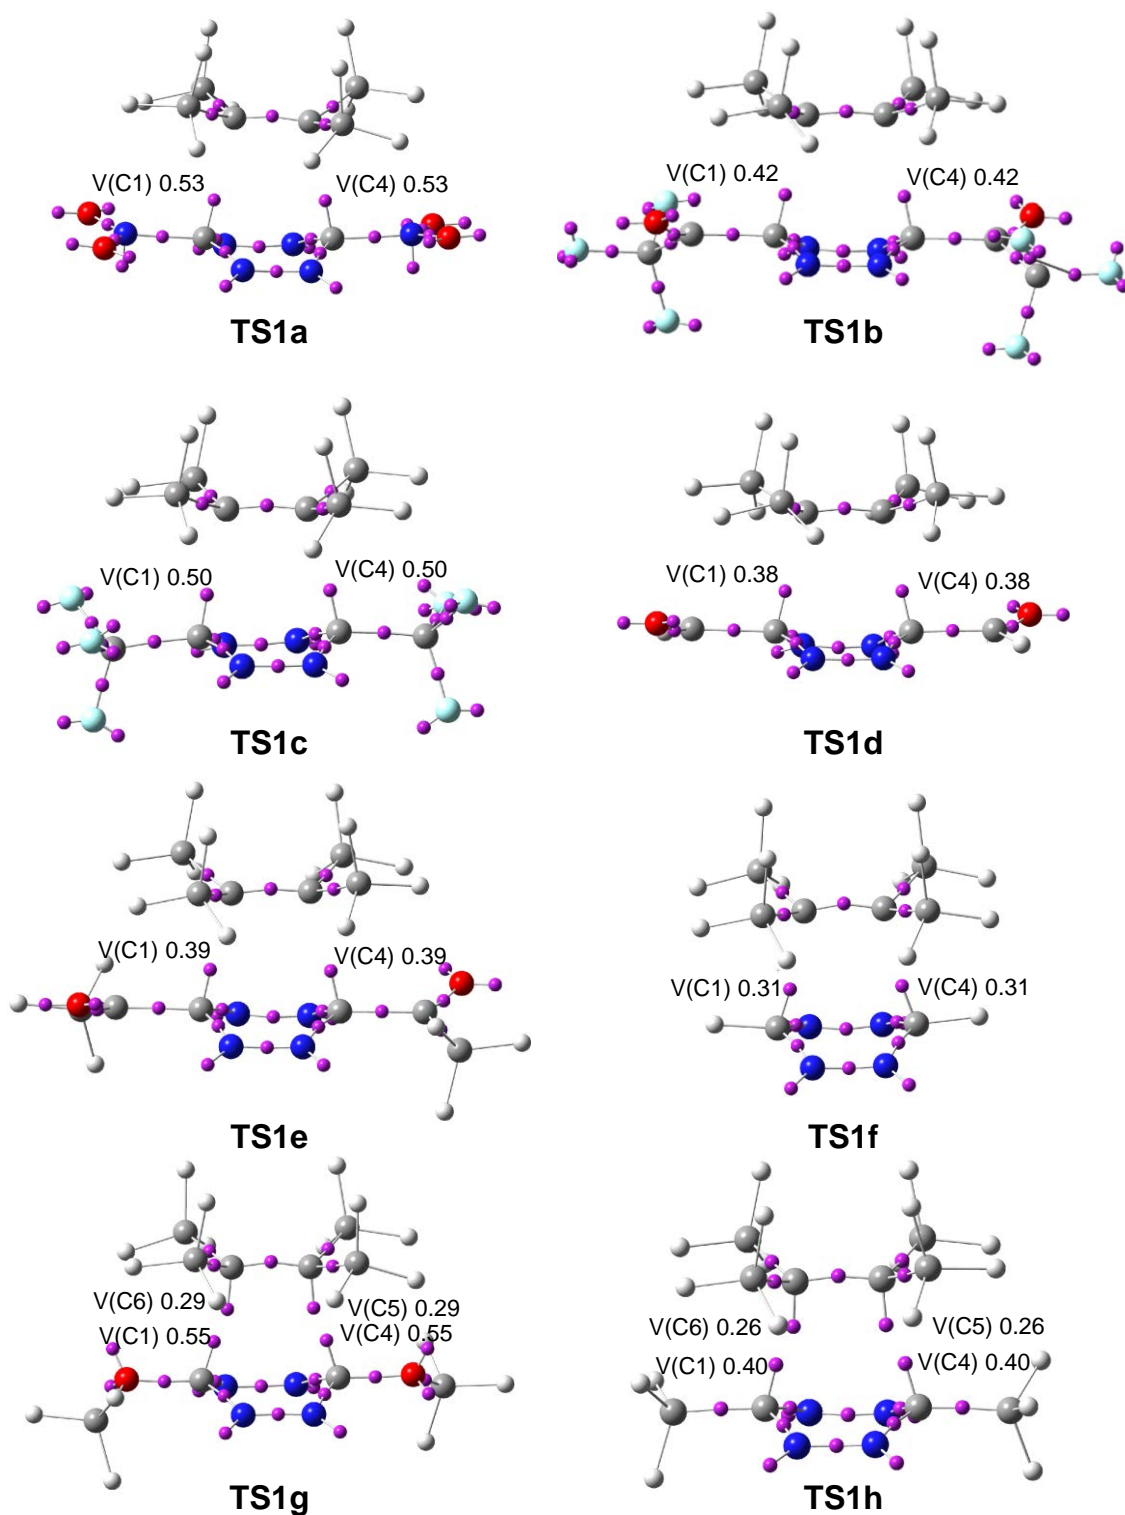

**Figure S3.** Attractor positions of the ELF valence basins of the **TS1a-h**. The electron populations, in average number of electrons, is given in e.

**Table S1.** MPW95/6-311G(d,p) electronic chemical potential  $\mu$ , chemical hardness  $\eta$ , global electrophilicity  $\omega$ , and global nucleophilicity  $N$ , in eV, for the studied reagents.

|               | R                 | $\mu$ | $\eta$ | $\omega$ | $N$  |
|---------------|-------------------|-------|--------|----------|------|
| <b>TCE 18</b> |                   | -7.35 | 6.09   | 4.44     | 0.00 |
| <b>14a</b>    | NO <sub>2</sub>   | -6.92 | 6.01   | 3.98     | 0.47 |
| <b>14b</b>    | COCF <sub>3</sub> | -6.50 | 5.56   | 3.80     | 1.11 |
| <b>14c</b>    | CF <sub>3</sub>   | -6.25 | 6.03   | 3.24     | 1.13 |
| <b>14d</b>    | CHO               | -5.98 | 5.74   | 3.12     | 1.54 |
| <b>14e</b>    | COMe              | -5.55 | 5.85   | 2.63     | 1.92 |
| <b>14f</b>    | H                 | -5.17 | 6.03   | 2.22     | 2.21 |
| <b>14g</b>    | OMe               | -4.94 | 5.91   | 2.07     | 2.50 |
| <b>14h</b>    | Me                | -4.75 | 5.90   | 1.91     | 2.70 |
| Ethylene 2    |                   | -3.67 | 9.90   | 0.68     | 1.78 |
| <b>TME 15</b> |                   | -2.64 | 8.85   | 0.40     | 3.33 |

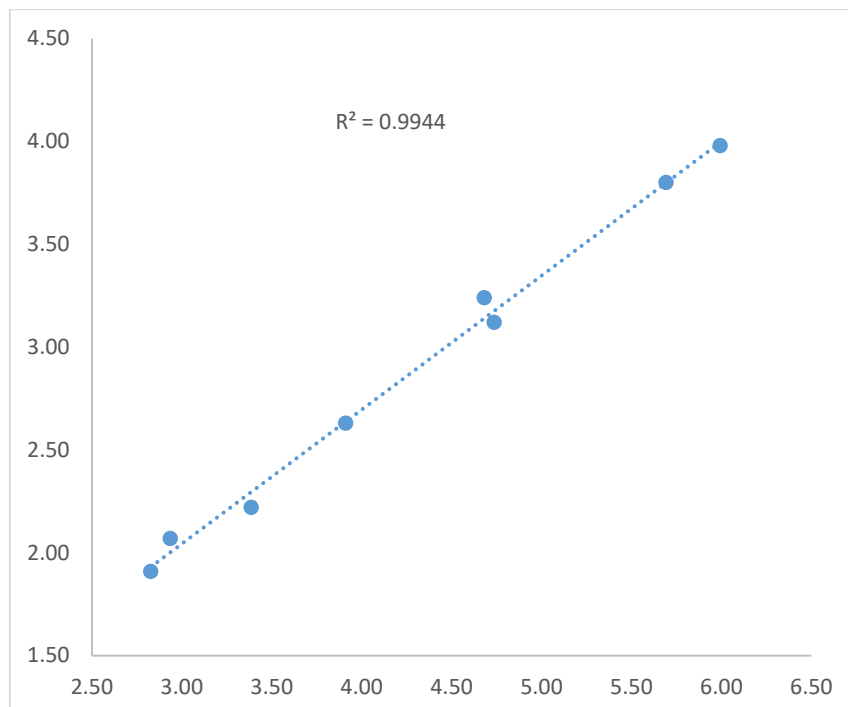

**Figure S4.** Lineal correlation between the B3LYP/6-31G(d) and the MPW95/6-311G(d,p) global electrophilicity  $\omega$  indices of tetrazines **14a-h**.

**Table S2.** MPW95/6-311G(d,p) electronic energies (E, in a.u.), enthalpies (H, in a.u.), entropies (S, in cal/mol.K) and Gibbs free energies (G, in a.u.), computed at 25 °C and 1 atm in DCM, for the stationary points involved in the domino reactions of the series tetrazine derivatives **14a-d** with TME **15**.

|             | E            | H            | S     | G            |
|-------------|--------------|--------------|-------|--------------|
| <b>15</b>   | -235.762490  | -235.587197  | 83.6  | -235.626919  |
| <b>N2</b>   | -109.503466  | -109.494303  | 45.7  | -109.516020  |
| <b>14a</b>  | -705.149383  | -705.080595  | 97.9  | -705.127111  |
| <b>Mca</b>  | -940.922268  | -940.674856  | 139.2 | -940.741013  |
| <b>TS1a</b> | -940.912397  | -940.666115  | 125.2 | -940.725597  |
| <b>16a</b>  | -940.970454  | -940.720548  | 120.3 | -940.777724  |
| <b>TS2a</b> | -940.943065  | -940.695819  | 123.5 | -940.754490  |
| <b>17a</b>  | -831.529971  | -831.292073  | 121.6 | -831.349837  |
| <b>14b</b>  | -1196.907292 | -1196.808467 | 127.2 | -1196.868915 |
| <b>MCb</b>  | -1432.679571 | -1432.401999 | 172.1 | -1432.483772 |
| <b>TS1b</b> | -1432.660915 | -1432.384802 | 155.7 | -1432.458802 |
| <b>16b</b>  | -1432.710327 | -1432.430657 | 147.2 | -1432.500576 |
| <b>TS2b</b> | -1432.687818 | -1432.410889 | 152.4 | -1432.483282 |
| <b>17b</b>  | -1323.276623 | -1323.008965 | 150.5 | -1323.080485 |
| <b>14c</b>  | -970.314012  | -970.239771  | 106.1 | -970.290182  |
| <b>MCc</b>  | -1206.086454 | -1205.832324 | 149.2 | -1205.903192 |
| <b>TS1c</b> | -1206.062581 | -1205.809544 | 132.8 | -1205.872633 |
| <b>16c</b>  | -1206.123165 | -1205.867072 | 130.6 | -1205.929146 |
| <b>TS2c</b> | -1206.097969 | -1205.844381 | 130.6 | -1205.906414 |
| <b>17c</b>  | -1096.683435 | -1096.439244 | 128.8 | -1096.500435 |
| <b>14d</b>  | -522.842940  | -522.761816  | 90.3  | -522.804719  |
| <b>MCd</b>  | -758.613679  | -758.355212  | 133.1 | -758.418447  |
| <b>TS1d</b> | -758.591740  | -758.333398  | 120.8 | -758.390792  |
| <b>16d</b>  | -758.640010  | -758.378397  | 114.6 | -758.432846  |
| <b>TS2d</b> | -758.620460  | -758.361296  | 119.3 | -758.417958  |
| <b>17d</b>  | -649.199426  | -648.949699  | 117.1 | -649.005329  |

**Table S3.** MPW95/6-311G(d,p) electronic energies (E, in a.u.), enthalpies (H, in a.u.), entropies (S, in cal/mol.K) and Gibbs free energies (G, in a.u.), computed at 25 °C and 1 atm in DCM, for the stationary points involved in the domino reactions of the series tetrazine derivatives **14e-h** with TME **15**.

|             | E           | H           | S     | G           |
|-------------|-------------|-------------|-------|-------------|
| <b>14e</b>  | -601.469316 | -601.329645 | 103.5 | -601.378816 |
| <b>Mce</b>  | -837.241281 | -836.923300 | 150.4 | -836.994750 |
| <b>TS1e</b> | -837.216513 | -836.898310 | 133.3 | -836.961668 |
| <b>16e</b>  | -837.265269 | -836.943881 | 127.4 | -837.004412 |
| <b>TS2e</b> | -837.243974 | -836.925040 | 132.5 | -836.987995 |
| <b>17e</b>  | -727.828883 | -727.519393 | 130.1 | -727.581208 |
| <b>14f</b>  | -296.250369 | -296.191733 | 68.0  | -296.224042 |
| <b>MCf</b>  | -532.019808 | -531.782661 | 118.8 | -531.839099 |
| <b>TS1f</b> | -531.992498 | -531.756747 | 103.4 | -531.805878 |
| <b>16f</b>  | -532.050019 | -531.810586 | 98.4  | -531.857330 |
| <b>TS2f</b> | -532.023820 | -531.787310 | 99.5  | -531.834573 |
| <b>17f</b>  | -422.601918 | -422.375955 | 94.6  | -422.420890 |
| <b>14g</b>  | -525.274277 | -525.143621 | 93.1  | -525.187838 |
| <b>MCg</b>  | -761.044139 | -760.734621 | 137.7 | -760.800025 |
| <b>TS1g</b> | -761.004197 | -760.696710 | 125.1 | -760.756165 |
| <b>16g</b>  | -761.059871 | -760.750670 | 119.2 | -760.807294 |
| <b>TS2g</b> | -761.045961 | -760.737557 | 121.1 | -760.795116 |
| <b>17g</b>  | -651.638842 | -651.339490 | 117.7 | -651.395400 |
| <b>14h</b>  | -374.869781 | -374.753117 | 83.8  | -374.792915 |
| <b>MCh</b>  | -610.638501 | -610.344321 | 125.7 | -610.404055 |
| <b>TS1h</b> | -610.602603 | -610.307359 | 114.6 | -610.361792 |
| <b>16h</b>  | -610.657750 | -610.359038 | 109.8 | -610.411208 |
| <b>TS2h</b> | -610.633376 | -610.337438 | 113.1 | -610.391199 |
| <b>17h</b>  | -501.216475 | -500.930536 | 106.8 | -500.981266 |

**Table S4.** MPW95/6-311G(d,p) electronic energies (E, in a.u.), enthalpies (H, in a.u.), entropies (S, in cal/mol.K) and Gibbs free energies (G, in a.u.), computed at 25 °C and 1 atm in DCM, for the stationary points involved in the domino reactions of the series tetrazine derivatives **14f-h** with TCE **18**.

|             | E           | H           | S     | G           |
|-------------|-------------|-------------|-------|-------------|
| <b>18</b>   | -447.412441 | -447.353755 | 93.7  | -447.398282 |
| <b>14f</b>  | -296.250369 | -296.191734 | 68.0  | -296.224044 |
| <b>MCi</b>  | -743.671571 | -743.552230 | 129.4 | -743.613714 |
| <b>TS1i</b> | -743.609098 | -743.492206 | 112.5 | -743.545636 |
| <b>19i</b>  | -743.660889 | -743.540928 | 110.0 | -743.593187 |
| <b>TS2i</b> | -743.639276 | -743.522318 | 111.7 | -743.575377 |
| <b>20i</b>  | -634.221429 | -634.114355 | 107.4 | -634.165384 |
| <b>14g</b>  | -525.274277 | -525.143619 | 93.1  | -525.187836 |
| <b>MCj</b>  | -972.696831 | -972.505410 | 153.6 | -972.578394 |
| <b>TS1j</b> | -972.631587 | -972.442820 | 135.7 | -972.507281 |
| <b>19j</b>  | -972.667580 | -972.477027 | 136.6 | -972.541921 |
| <b>TS2j</b> | -972.657040 | -972.468551 | 136.0 | -972.533160 |
| <b>20j</b>  | -863.255869 | -863.075764 | 131.7 | -863.138355 |
| <b>14h</b>  | -374.869781 | -374.753117 | 83.8  | -374.792915 |
| <b>MCk</b>  | -822.292731 | -822.115362 | 140.6 | -822.182181 |
| <b>TS1k</b> | -822.234947 | -822.059083 | 126.8 | -822.119334 |
| <b>19k</b>  | -822.280144 | -822.102589 | 118.0 | -822.158641 |
| <b>TS2k</b> | -822.259275 | -822.083558 | 127.5 | -822.144158 |
| <b>20k</b>  | -712.845780 | -712.679087 | 120.5 | -712.736340 |



**Table S5.** MPWB1K/6-311G(d,p) unique imaginary frequency of the TSs **TS1a-k** and **TS2a-k** computed in DCM, in  $\text{cm}^{-1}$ .

---

|             |           |
|-------------|-----------|
| <b>TS1a</b> | -286.2929 |
| <b>TS1b</b> | -337.4865 |
| <b>TS1c</b> | -350.5034 |
| <b>TS1d</b> | -379.2771 |
| <b>TS1e</b> | -389.2782 |
| <b>TS1f</b> | -432.0035 |
| <b>TS1g</b> | -474.5200 |
| <b>TS1h</b> | -473.2847 |
| <b>TS1i</b> | -432.0035 |
| <b>TS1j</b> | -568.1225 |
| <b>TS1k</b> | -548.4563 |
| <b>TS2a</b> | -582.5346 |
| <b>TS2b</b> | -583.5926 |
| <b>TS2c</b> | -576.9181 |
| <b>TS2d</b> | -579.7784 |
| <b>TS2e</b> | -578.0920 |
| <b>TS2f</b> | -616.9326 |
| <b>TS2g</b> | -597.8970 |
| <b>TS2h</b> | -600.4108 |
| <b>TS2i</b> | -619.0927 |
| <b>TS2j</b> | -578.7566 |
| <b>TS2k</b> | -601.7070 |

---
